# Supplementary material for: Risk of Metabolic Syndrome and Diabetes Among Young Twins and Singletons in Guinea-Bissau
Source: Oxford University Press journal article supplement (doi:10.2337/dc12-2653), 2013-08-16
Supplement: dc122653supplementarydata.pdf [file dc122653supplementarydata.pdf]

SUPPLEMENTARY DATA

**Supplementary Table 1.** Prevalence of individual MS components among 364 twins and 360 singletons. Cells are n (%).

|                               | <b>Twins</b><br>N=364 | <b>Singletons</b><br>N=360 | <b>P</b> | <b>PR</b>        |
|-------------------------------|-----------------------|----------------------------|----------|------------------|
| <b>Elevated WC</b>            | 54 (14.8%)            | 65 (18.1%)                 | 0.28     | 0.82 (0.57-1.17) |
| <b>Elevated Systolic BP</b>   | 13 (3.6%)             | 19 (5.3%)                  | 0.29     | 0.68 (0.33-1.39) |
| <b>Elevated Diastolic BP</b>  | 12 (3.3%)             | 14 (3.9%)                  | 0.68     | 0.85 (0.38-1.87) |
| <b>Decreased HDL</b>          | 79 (21.7%)            | 77 (21.4%)                 | 0.92     | 1.01 (0.76-1.35) |
| <b>Elevated Triglycerides</b> | 21 (5.8%)             | 23 (6.4%)                  | 0.73     | 0.90 (0.50-1.62) |
| <b>Elevated F-glucose</b>     | 127 (34.9%)           | 89 (24.7%)                 | 0.003    | 1.41 (1.12-1.78) |

According to IDF recommendations MS has not been calculated for individuals below 10 years of age.
